# Supplementary material for: CAMK1D Triggers Immune Resistance of Human Tumor Cells Refractory to Anti–PD-L1 Treatment
Source: Oxford University Press journal article supplement (doi:10.1158/2326-6066.cir-19-0608), 2020-07-14
Supplement: 23266066cir190608-sup-227008_2_supp_6318845_q4y4q4.xlsx [file 23266066cir190608-sup-227008_2_supp_6318845_q4y4q4.xlsx]

## Sheet: Genes
Gene	ReagentName	GeneID
AAK1	M-005300-00	22848
AATK	M-005301-01	9625
ABCA1	M-004128-02	19
ABCB1	M-003868-02	5243
ABCB7	M-007305-00	22
ABCC1	M-007308-00	4363
ABCC2	M-004225-00	1244
ABCC3	M-007312-00	8714
ABCC6	M-007315-01	368
ABCC9	M-007316-00	39608
ABCD1	M-009605-00	215
ABI1	M-007290-02	10006
ABL1	M-003100-01	25
ABL2	M-003101-01	27
ACAD10	M-007684-01	80724
ACP1	M-019058-00	52
ACP5	M-009615-01	54
ACPP	M-009262-00	55
ACTBL1	M-032372-00	23784
ACTN1	M-011195-00	87
ACTN2	M-011196-01	88
ACTN3	M-011197-01	89
ACTN4	M-011988-01	81
ACVR1	M-004924-01	90
ACVR1B	M-004925-01	91
ACVR1C	M-004929-01	130399
ACVR2A	M-004926-01	92
ACVR2B	M-004927-00	93
ACVRL1	M-005302-02	94
ADAM9	M-004504-02	8754
ADCK1	M-005303-02	57143
ADCK2	M-005304-01	90956
ADCK4	M-005305-01	79934
ADCK5	M-018919-00	203054
ADCYAP1R1	M-005413-01	117
ADD1	M-009487-00	118
ADD3	M-008468-00	120
ADK	M-004733-02	132
ADM	M-011199-00	133
ADMR	M-005414-00	11318
ADORA1	M-005415-01	134
ADORA2A	M-005416-01	135
ADORA2B	M-005417-01	136
ADORA3	M-005418-01	140
ADRA1A	M-005419-00	148
ADRA1A	M-005419-00	148
ADRA1B	M-005420-01	147
ADRA1B	M-005420-01	147
ADRA1D	M-005421-00	146
ADRA2A	M-005422-00	150
ADRA2B	M-005423-01	151
ADRA2C	M-005424-01	152
ADRB1	M-005425-01	153
ADRB2	M-005426-01	154
ADRB2	M-005426-01	154
ADRB3	M-005427-00	155
ADRBK1	M-004325-01	156
ADRBK1	M-004325-01	156
ADRBK2	M-004326-00	157
ADRBK2	M-004326-00	157
AFP	M-011202-00	174
AGK	M-007256-00	55750
AGRP	M-011204-01	181
AGTR1	M-005428-01	185
AGTR2	M-005429-01	186
AGTR2	M-005429-01	186
AGTRL1	M-005430-01	187
AHR	M-004990-00	196
AIMP1	M-011924-00	9255
AIP	M-006325-00	9049
AK1	M-006811-02	203
AK2	M-006812-00	204
AK3	M-006701-00	50808
AK4	M-006700-01	205
AK4	M-032359-00	387851
AK5	M-004897-02	26289
AK7	M-007257-00	122481
AK8	M-006803-00	158067
AKAP1	M-011426-01	8165
AKAP10	M-017300-00	11216
AKAP11	M-009277-01	11215
AKAP13	M-008868-01	11214
AKAP3	M-009765-01	10566
AKAP4	M-008442-00	8852
AKAP5	M-011954-00	9495
AKAP6	M-008497-01	9472
AKAP7	M-013371-00	9465
AKAP8	M-009656-01	10270
AKAP9	M-017362-00	10142
AKD1	M-007254-01	221264
AKT1	M-003000-01	207
AKT1	M-003000-01	207
AKT2	M-003001-01	208
AKT3	M-003002-01	10000
ALCAM	M-004574-00	214
ALDH18A1	M-006785-00	5832
ALK	M-003103-02	238
ALPK1	M-005009-01	80216
ALPK2	M-005330-02	115701
ALPK3	M-005350-01	57538
AMH	M-010991-00	268
AMHR2	M-005307-01	269
AMTN	M-032546-00	401138
ANGPT1	M-007802-01	284
ANGPT2	M-006315-00	285
ANGPT4	M-007803-00	51378
ANGPTL1	M-007804-01	9068
ANGPTL2	M-007805-01	23452
ANK1	M-010992-00	286
ANKH	M-012898-00	56172
ANKK1	M-004930-01	255239
ANXA7	M-010760-01	310
AP2B1	M-003627-01	163
AP3B1	M-017533-00	8546
APOA1	M-010994-00	335
APOC1	M-011574-00	341
APOC4	M-011575-00	346
APOL2	M-017407-00	2378
APOL3	M-013434-00	80833
APOM	M-010984-00	55937
APPL1,ASB14	M-005138-00	26060
AQP1	M-021494-00	358
AQP2	M-019263-00	359
AQP3	M-011812-00	360
AQP4	M-011578-01	361
AQP5	M-004520-01	362
AQP6	M-011579-00	363
AQP7	M-008726-00	364
AR	M-003400-00	367
ARAF	M-003563-02	369
AREG	M-017435-00	374
ARL13A	M-031561-00	0
ARL3	M-011813-00	403
ARNT	M-007207-01	405
ARNT2	M-008920-00	9915
ARNTL	M-010261-00	406
ARNTL2	M-009284-01	56938
ARP3BETA	M-020372-00	5718
ARPP19	M-015338-00	10776
ARRB1	M-011971-00	408
ARVCF	M-011586-00	421
ASB18	M-032545-00	401036
ASGR2	M-011215-00	433
ASIP	M-011587-00	434
ASTL	M-032349-00	431705
ATM	M-003201-02	472
ATP6V0A4	M-013185-00	50617
ATR	M-003202-04	545
AURKA	M-003545-10	6790
AURKB	M-003326-02	9212
AURKC	M-019573-01	6795
AVP	M-010997-00	551
AVPR1A	M-003631-01	552
AVPR1A	M-003631-01	552
AVPR1B	M-005431-00	553
AVPR1B	M-005431-00	553
AVPR2	M-005432-00	554
AXL	M-003104-02	558
AZU1	M-008914-00	566
BAG4	M-004379-02	18141
BAI1	M-005433-00	575
BAI2	M-003632-01	576
BAI3	M-005434-00	577
BCAM	M-010608-00	4059
BCKDK	M-004932-00	10295
BCL10	M-004381-01	8915
BDKRB1	M-005435-00	623
BDKRB2	M-005436-00	624
BDKRB2	M-005436-00	624
BDNF	M-017626-00	627
BEST1	M-019825-00	7439
BLID	M-032329-00	414899
BLK	M-003105-03	640
BLNK	M-020353-01	29760
BLOC1S3	M-032540-00	388552
BLR1	M-005437-01	643
BMP15	M-012018-01	42978
BMP2	M-011219-00	650
BMP2K	M-005071-00	55589
BMP3	M-011220-01	651
BMP4	M-011221-00	652
BMP5	M-017549-01	653
BMP6	M-021475-01	654
BMP7	M-011592-00	655
BMP8B	M-011593-01	656
BMPR1A	M-004933-03	657
BMPR1B	M-004934-01	658
BMPR2	M-005309-02	659
BMX	M-003106-02	660
BPY2B	M-032352-00	442867
BPY2C	M-032353-00	442868
BRAF	M-003460-01	673
BRD2	M-004935-01	6046
BRDT	M-004938-01	676
BRS3	M-005438-01	680
BRSK1	M-004619-01	84446
BRSK2	M-005381-03	9024
BTBD7	M-027198-00	55727
BTK	M-003107-01	695
BUB1	M-004102-00	699
BUB1B	M-004101-00	701
BZRAP1	M-019846-00	9256
BZRP	M-009559-00	706
C10ORF55	M-032331-00	414236
C14orf37	M-032335-00	145407
C16orf74	M-032539-00	404550
C16orf87	M-032311-00	388272
C17ORF35	M-005440-01	8834
C1orf168	M-032380-00	199920
C1orf194	M-031702-00	127003
C1orf95	M-032363-00	375057
C21orf119	M-032524-00	84996
C21ORF37	M-032493-00	54076
C21orf49	M-032498-00	54067
C3	M-011001-01	718
C3AR1	M-005441-00	719
C4B	M-032347-00	432395
C5	M-007819-00	727
C5R1	M-005442-00	728
C7ORF9	M-017985-00	64111
C8orf82	M-032333-00	414919
C9orf173	M-032408-00	441476
C9orf47	M-032342-00	286223
C9orf96	M-005347-00	169436
CACNA2D1	M-020206-00	781
CALCA	M-021447-00	796
CALCR	M-003635-00	799
CALCRL	M-004350-00	10203
CALHM1	M-032306-00	255022
CALM1	M-017646-00	801
CALM3	M-019939-01	808
CAMK1	M-004940-00	8536
CAMK1D	M-004946-00	57118
CAMK1G	M-004941-01	57172
CAMK2A	M-004942-00	815
CAMK2B	M-004943-03	816
CAMK2D	M-004042-02	817
CAMK2G	M-004536-01	818
CAMK4	M-004944-01	814
CAMKK1	M-004912-00	84254
CAMKK2	M-004842-01	10645
CAMKV	M-005349-01	79012
CANT1	M-018707-00	124583
CARD10	M-004395-00	29775
CARD14	M-004397-00	79092
CASK	M-005311-01	8573
CASR	M-005444-01	846
CATSPER2	M-006132-01	117155
CCBP2	M-005445-00	1238
CCDC88A	M-032517-00	55704
CCK	M-011163-00	885
CCL1	M-007822-01	6346
CCL11	M-007823-01	6356
CCL13	M-007824-01	6357
CCL14	M-007825-00	6358
CCL15	M-007826-01	6359
CCL16	M-007827-01	11840
CCL17	M-007828-01	6361
CCL18	M-007829-01	6362
CCL19	M-007830-01	6363
CCL2	M-007831-00	6347
CCL2	M-007831-00	6347
CCL20	M-007832-01	6364
CCL21	M-007833-00	6366
CCL22	M-007834-00	6367
CCL23	M-007835-01	6368
CCL24	M-007836-01	6369
CCL25	M-007837-01	6370
CCL26	M-007838-00	10344
CCL27	M-007839-00	29859
CCL28	M-007840-00	56477
CCL3	M-007841-01	6348
CCL3L1	M-007842-00	6349
CCL4L2,CCL4L1,CCL4	M-007843-01	6351
CCL5	M-007844-00	6352
CCL7	M-007845-01	6354
CCL8	M-007846-01	6355
CCR1	M-005448-01	1230
CCR2	M-005449-00	1231
CCR3	M-005450-01	1232
CCR4	M-005451-01	1233
CCR5	M-004855-02	1234
CCR6	M-005453-00	1235
CCR7	M-005454-01	1236
CCR8	M-005455-01	1237
CCR9	M-005456-01	10803
CCRL1	M-005457-01	51554
CCRL2	M-005458-01	9034
CD14	M-011121-00	929
CD163L1	M-008024-01	283316
CD180	M-020015-00	4064
CD1D	M-019429-00	912
CD2	M-017854-00	914
CD247	M-004257-01	919
CD28	M-012734-00	940
CD300C	M-017088-00	10871
CD300E	M-017895-00	34251
CD300LB	M-017772-00	124599
CD300LF	M-016694-00	146722
CD302,LY75-CD302	M-018909-00	9936
CD33	M-019502-00	945
CD36	M-010206-01	948
CD3D	M-020205-00	915
CD3E	M-003775-01	916
CD3E	M-003775-01	916
CD3G	M-011005-00	917
CD4	M-005234-01	920
CD40	M-008101-01	958
CD40LG	M-011006-00	959
CD44	M-009999-01	960
CD46	M-004570-00	4179
CD5	M-007848-01	921
CD6	M-007850-01	923
CD69	M-006359-01	969
CD7	M-013630-02	924
CD70	M-009952-01	970
CD72	M-019508-01	971
CD80	M-007851-01	941
CD86	M-007852-00	942
CD8A	M-017568-00	925
CD8B	M-011975-00	926
CD93	M-007815-01	22918
CD97	M-003638-00	976
CDADC1	M-007732-00	81602
CDC10	M-011607-00	989
CDC14A	M-003469-00	8556
CDC14B	M-003470-02	8555
CDC25A	M-003226-02	993
CDC25B	M-003227-02	994
CDC25C	M-003228-01	995
CDC42BPA	M-003814-02	8476
CDC42BPB	M-004075-01	9578
CDC42BPG	M-007691-01	55561
CDC42SE2	M-020826-01	56990
CDC7	M-003234-02	8317
CDK1	M-003224-03	983
CDK10	M-003235-04	8558
CDK11B,CDK11A	M-004687-01	984
CDK11B,CDK11A	M-004026-01	985
CDK12	M-004031-02	51755
CDK13	M-004688-00	8621
CDK14	M-004837-01	5218
CDK15	M-004685-01	65061
CDK16	M-004313-00	5127
CDK17	M-004835-01	5128
CDK18	M-004836-02	5129
CDK19	M-004689-00	23097
CDK2	M-003236-04	1017
CDK20	M-004686-01	23552
CDK2AP1	M-011902-00	8099
CDK3	M-003237-01	1018
CDK4	M-003238-02	1019
CDK5	M-003239-01	1020
CDK5R1	M-008988-00	8851
CDK5R2	M-008885-00	8941
CDK5RAP1	M-013297-01	51654
CDK5RAP3	M-012957-00	80279
CDK6	M-003240-02	1021
CDK7	M-003241-01	1022
CDK8	M-003242-02	1024
CDK9	M-003243-02	1025
CDKL1	M-004323-01	8814
CDKL2	M-004797-00	8999
CDKL3	M-004798-00	51265
CDKL5	M-004799-02	6792
CDKN1A	M-003471-00	1026
CDKN1B	M-003472-00	1027
CDKN1C	M-003244-03	1028
CDKN2B	M-003245-02	1030
CDKN2C	M-003246-01	1031
CDKN2D	M-003247-02	1032
CDKN3	M-003879-00	1033
CDY1B	M-032370-00	253175
CELSR1	M-005459-00	9620
CELSR2	M-005460-00	1952
CELSR3	M-005461-00	1951
CENPE	M-003252-01	1062
CERK	M-004061-00	64781
CGA	M-013210-00	1081
CHAF1B	M-019937-00	8208
CHEK1	M-003255-02	1111
CHEK2	M-003256-05	11200
CHGB	M-011609-00	1114
CHKA	M-006704-00	1119
CHKB	M-006705-00	1120
CHRM1	M-005462-01	1128
CHRM2	M-005463-00	1129
CHRM3	M-005464-01	1131
CHRNA1	M-006134-01	1134
CHRNA10	M-006135-00	57053
CHRNA2	M-006136-01	1135
CHRNA3	M-006137-01	1136
CHRNA4	M-006138-01	1137
CHRNA5	M-006139-01	1138
CHRNA6	M-006140-01	8973
CHRNA7	M-004143-01	1139
CHRNA9	M-006141-01	55584
CHRNB1	M-006142-01	40178
CHRNB2	M-006143-01	1141
CHRNB3	M-006144-01	1142
CHRND	M-006146-00	1144
CHRNE	M-006147-00	1145
CHTF8	M-032354-00	54921
CHUK	M-003473-01	1147
CIB1	M-012261-00	10519
CINP	M-013591-01	51550
CIT	M-004613-00	11113
CITED4	M-015355-00	163732
CKB	M-006706-01	1152
CKLF,CKLF-CMTM1	M-010709-00	51192
CKM	M-006707-00	1158
CKMT1B,CKMT1A	M-006708-00	1159
CKMT2	M-006709-00	1160
CKS1B	M-004586-01	1163
CKS2	M-007678-00	1164
CLCA2	M-003813-01	9635
CLCF1	M-020622-00	23529
CLCN1	M-006149-00	41639
CLCN2	M-006150-01	1181
CLCN5	M-006153-01	1184
CLCN7	M-006155-00	1186
CLCNKA	M-006156-01	1187
CLDN16	M-012294-00	10686
CLDN20	M-032303-00	49861
CLDN3	M-017303-00	1365
CLDN4	M-013612-00	1364
CLEC2	M-021142-00	51266
CLEC2D	M-012491-00	29121
CLEC4D	M-021373-00	338339
CLEC4M	M-016287-01	10332
CLIC4	M-013553-00	25932
CLIC5	M-020570-00	53405
CLK1	M-004800-00	1195
CLK2	M-004801-01	1196
CLK3	M-004802-01	1198
CLK4	M-004803-00	57396
CLOCK	M-008212-00	9575
CLTCL1	M-011611-00	8218
CMKLR1	M-005467-00	2024-01-01
CMPK1	M-004059-00	51727
CMTM7	M-010749-01	112616
CNKSR1	M-012217-00	10256
CNOT2	M-020313-00	4848
CNOT7	M-012897-00	29883
CNR1	M-004711-01	1268
CNR2	M-005469-01	1269
CNTF	M-011125-00	44926
CNTFR	M-007856-00	1271
CNTNAP2	M-017329-00	26047
CNTNAP3	M-010948-00	79937
COASY	M-006751-00	80347
COG4	M-013993-00	25839
COL11A1	M-011614-01	1301
COL14A1	M-025907-00	7373
COL18A1	M-012915-00	80781
COL19A1	M-011617-00	9862
COL4A3	M-011013-00	1285
COL4A3BP	M-012101-00	10087
COL4A6	M-011619-00	1288
COL5A1	M-011015-00	1289
COL6A1	M-011620-00	1291
COL6A2	M-011621-00	1292
COL6A3	M-003646-01	1293
COL7A1	M-011017-00	1294
COL8A2	M-012020-00	1296
COMP	M-011018-00	1311
COPB2	M-019847-01	9276
CORO1A	M-012771-00	11151
CORT	M-027334-00	1325
COX4NB	M-032511-00	10328
CPNE7	M-012525-00	27132
CR1	M-007859-00	1378
CR2	M-007861-00	12419
CRB1	M-012404-00	23418
CRH	M-011165-00	1392
CRHR1	M-003647-00	1394
CRHR2	M-005470-01	1395
CRK	M-010503-02	1398
CRKL	M-012023-01	1399
CRLF2	M-015312-00	64109
CRY1	M-015421-00	1407
CSF1	M-017514-00	1435
CSF1R	M-003109-02	1436
CSF2	M-011166-00	1437
CSF2RA	M-007864-00	1438
CSF2RB	M-007865-00	1439
CSF3	M-007866-00	14610
CSF3R	M-007867-00	1441
CSHL1	M-010962-00	1444
CSK	M-003110-02	1445
CSNK1A1L	M-004681-01	122011
CSNK1A1L,CSNK1A1	M-003957-03	1452
CSNK1D	M-003478-00	1453
CSNK1E	M-003479-01	1454
CSNK1G1	M-004666-01	53944
CSNK1G2	M-004678-00	1455
CSNK1G3	M-004679-02	1456
CSNK2A1,CSNK2A1P	M-003475-00	1457
CSNK2A2	M-004752-00	1459
CSNK2B	M-007679-00	1460
CTDP1	M-009326-01	40786
CTDSP1	M-013777-00	5819
CTF1	M-020183-00	1489
CTNNA2	M-019893-00	1496
CTNND1	M-012572-00	39568
CTNND2	M-003611-00	1501
CTNS	M-019914-00	1497
CUBN	M-011175-00	8029
CX3CL1	M-007870-01	6376
CX3CR1	M-005471-00	1524
CXADR	M-003650-00	1525
CXCL1	M-003898-00	2919
CXCL10	M-007871-00	3627
CXCL11	M-007872-01	6373
CXCL12	M-007873-00	6387
CXCL13	M-007874-01	10563
CXCL14	M-007875-00	9547
CXCL2	M-007877-01	2920
CXCL3	M-007878-01	2921
CXCL9	M-007881-00	4283
CXCR3	M-005472-02	2833
CXCR4	M-005139-01	7852
CXCR6	M-005474-00	10663
CXCR7	M-013212-00	57007
CXorf30	M-031605-00	771887
CYFIP2	M-021477-00	26999
CYP2D7P1	M-032358-00	1564
CYSLTR1	M-005475-01	10800
CYSLTR2	M-005476-01	57105
CYTL1	M-021221-00	5436
DAG1	M-010452-01	1605
DAK	M-006808-00	26007
DAPK1	M-004417-02	1612
DAPK2	M-004418-02	23604
DAPK3	M-004947-00	1613
DBF4	M-004165-01	10926
DBI	M-006488-00	1622
DBX2	M-032388-00	440097
DCC	M-003880-01	21550
DCK	M-006710-00	1633
DCLK1	M-004884-01	9201
DCLK2	M-005017-01	166614
DCLK3	M-005337-00	85443
DDI1	M-032326-00	414301
DDR1	M-003111-03	780
DDR2	M-003112-03	4921
DEFB108	M-032348-00	245911
DEFB4	M-012997-00	1673
DGCR2	M-011986-00	9993
DGKA	M-006711-02	1606
DGKB	M-006712-01	1607
DGKD	M-006713-03	8527
DGKE	M-011493-00	8526
DGKG	M-006715-00	1608
DGKI	M-006717-01	9162
DGKQ	M-005079-02	1609
DGKZ	M-006718-00	8525
DGUOK	M-006719-02	1716
DIAPH1	M-010347-01	1729
DLG1	M-009415-00	1739
DLG2	M-011252-01	1740
DLG3	M-009462-01	1741
DLG4	M-007882-01	1742
DLG5	M-008495-00	9231
DLL3	M-009506-01	10683
DLL4	M-010490-01	54567
DMBT1	M-007883-00	1755
DMD	M-011809-00	1756
DMPK	M-004637-00	1760
DNAJB3	M-032304-00	414061
DNAJC3	M-012251-00	5611
DOK1	M-011254-00	1796
DOK2	M-011562-00	9046
DOK4	M-015871-00	55715
DOK5	M-019050-00	55816
DOLPP1	M-017951-00	57171
DRD1	M-005477-00	1812
DRD5	M-005481-02	1816
DRP2	M-011642-00	1821
DTYMK	M-006720-00	1841
DUSP1	M-003484-02	1843
DUSP10	M-003965-01	11221
DUSP11	M-007885-00	8446
DUSP12	M-007886-01	11266
DUSP13	M-007887-00	51207
DUSP14	M-007888-00	11072
DUSP15	M-008484-01	128853
DUSP16	M-007890-00	80824
DUSP18	M-007891-00	15029
DUSP19	M-007892-01	142679
DUSP2	M-003565-01	1844
DUSP21	M-007893-01	63904
DUSP22	M-004517-00	56940
DUSP23	M-007909-00	54935
DUSP26	M-008027-01	78986
DUSP3	M-007894-00	1845
DUSP4	M-003963-02	1846
DUSP5	M-003566-01	1847
DUSP6	M-003964-01	1848
DUSP7	M-003567-00	1849
DUSP8	M-003568-00	1850
DUSP9	M-003569-00	1852
DVL1	M-004068-01	1855
DVL2	M-004069-01	1856
DYRK1A	M-004805-00	1859
DYRK1B	M-004806-01	9149
DYRK2	M-004730-02	8445
DYRK3	M-004731-00	8444
DYRK4	M-004732-01	8798
DZANK1-AS1	M-032400-00	440757
EBAF	M-017473-00	7044
EBI2	M-005482-01	1880
EBP	M-012282-00	10682
ECE2	M-005858-01	9718
EDA	M-003654-00	1896
EDAR	M-014034-00	10913
EDG1	M-003655-01	1901
EDG2	M-003656-01	1902
EDG3	M-005208-01	1903
EDG4	M-004602-01	9170
EDG5	M-003952-00	9294
EDG6	M-005484-01	8698
EDG7	M-004895-00	23566
EDG8	M-004791-00	53637
EDIL3	M-017593-00	10085
EDN1	M-016692-00	1906
EDN2	M-017723-01	1907
EDN3	M-011024-00	1908
EDNRA	M-005485-00	1909
EDNRB	M-003657-01	1910
EED	M-017581-01	8726
EEF2K	M-004950-00	29904
EFNA1	M-006369-01	1942
EFNA2	M-011260-00	1943
EFNA5	M-011649-00	1946
EFNB1	M-003658-01	1947
EFNB2	M-003659-02	1948
EGF	M-011650-00	33238
EGFL6	M-012994-00	25975
EGFR	M-003114-01	1956
EIF2AK1	M-005007-00	27102
EIF2AK2	M-003527-00	5610
EIF2AK3	M-004883-01	9451
EIF2AK4	M-005314-00	27104
ELN	M-009306-00	2006
ELOVL4	M-010269-01	6785
ELTD1	M-021612-00	64123
EMR1	M-005487-01	2015
EMR3	M-005489-01	84658
ENAM	M-014746-00	10117
ENPP2	M-004601-01	5168
EPAS1	M-004814-01	2034
EPB41	M-003660-01	2035
EPB41L1	M-019042-00	2036
EPB42	M-003662-00	2038
EPC1	M-006376-00	80314
EPHA1	M-003115-02	2041
EPHA2	M-003116-01	1969
EPHA3	M-003117-02	2042
EPHA4	M-003118-01	2043
EPHA5	M-005315-02	2044
EPHA6	M-005313-01	285220
EPHA7	M-003119-01	2045
EPHA8	M-003120-02	2046
EPHB1	M-003121-01	2047
EPHB2	M-003122-01	2048
EPHB3	M-003123-02	2049
EPHB4	M-003124-01	2050
EPHB6	M-003125-01	2051
EPM2A	M-006896-01	7957
EPO	M-020204-00	2056
EPS15L1	M-004006-00	58513
ERBB2	M-003126-01	2064
ERBB3	M-003127-02	2065
ERBB4	M-003128-02	2066
EREG	M-011268-00	2069
ERG	M-003886-01	2078
ERN1	M-004951-01	2081
ESM1	M-012338-01	11082
ESR1	M-003401-02	2099
ESR2	M-003402-00	39448
ESRRA	M-003403-01	2101
ESRRB	M-003404-00	2103
ESRRG	M-003405-00	2104
ETF1	M-019840-00	2107
ETFA	M-011029-00	2108
ETFB	M-010494-00	2109
ETNK1	M-006721-01	55500
ETNK2	M-005078-00	55224
ETV3L	M-032398-00	440695
EVI5	M-032510-00	7813
EVI5L	M-015901-01	115704
EVPL	M-019628-01	2125
EXOSC10	M-010904-00	5394
F2R	M-005094-01	2149
F2RL1	M-005095-01	2150
F2RL2	M-005491-01	2151
F2RL3	M-005492-01	9002
F3	M-004462-00	2152
FADD	M-003800-01	8772
FAM116B	M-032332-00	414918
FAM129B	M-032519-00	64855
FAM149A	M-032507-00	25854
FAM166A	M-032325-00	401565
FAM89B	M-016944-00	23625
FAS	M-003776-01	355
FASLG	M-011130-00	356
FASTK	M-005317-02	10922
FAT1	M-010513-01	2195
FAT2	M-011270-00	2196
FAU	M-013149-00	2197
FBLN1	M-019186-00	2192
FBN1	M-011034-00	39479
FBN2	M-011656-00	2201
FCAR	M-011657-00	2204
FCER1A	M-011658-00	2205
FCER1G	M-011856-00	2207
FCER2	M-016242-00	2208
FCGR1A	M-015650-00	2209
FCGR2A	M-014152-00	2212
FCGR2B	M-015823-00	2213
FCGR3B	M-019374-00	2215
FCGRT	M-017906-00	2217
FCRL1	M-018732-00	11535
FCRL2	M-016490-00	79368
FCRL3	M-016705-00	115352
FCRLA	M-014978-00	84824
FEM1B	M-015838-00	10116
FER	M-003129-01	2241
FES	M-003130-01	2242
FGF1	M-011172-00	2246
FGF10	M-011857-00	2255
FGF11	M-011858-00	2256
FGF13	M-011859-00	2258
FGF14	M-011860-00	2259
FGF16	M-011541-00	8823
FGF17	M-011540-00	8822
FGF18	M-011537-00	8817
FGF19	M-013670-00	9965
FGF20	M-013235-00	26281
FGF21	M-013305-00	26291
FGF23	M-013172-00	8074
FGF3	M-003889-00	2248
FGF4	M-003890-01	2249
FGF5	M-011972-00	44227
FGF6	M-003891-00	2251
FGF7	M-011659-00	2252
FGF8	M-013693-00	2253
FGF9	M-011660-00	2254
FGFR1	M-003131-02	2260
FGFR2	M-003132-01	2263
FGFR3	M-003133-01	2261
FGFR4	M-003134-01	2264
FGR	M-003135-02	2268
FIGF	M-017552-00	2277
FIGLA	M-032382-00	344018
FKBP8	M-009673-01	2377
FKSG79	M-005493-00	84636
FKSG83	M-014769-00	83954
FLG	M-021718-00	2312
FLJ10060	M-010712-00	55065
FLJ10458	M-015863-00	54475
FLJ11856	M-010743-01	79581
FLJ16124	M-032401-00	440867
FLJ16171	M-032404-00	441116
FLJ16323	M-032407-00	441390
FLJ16331	M-032385-00	440044
FLJ16353	M-032387-00	440077
FLJ31132	M-032410-00	441522
FLJ31393	M-009071-00	219445
FLJ32685	M-004052-02	152110
FLJ35107	M-007727-00	348825
FLJ35429	M-032368-00	285830
FLJ41170	M-032391-00	440200
FLJ41423	M-032317-00	399886
FLJ42258	M-032386-00	440049
FLJ42842	M-032394-00	440446
FLJ43692	M-032365-00	445328
FLJ44006	M-032321-00	400997
FLJ44790	M-032319-00	400850
FLJ44796	M-032324-00	401209
FLJ45300	M-032318-00	399957
FLJ45422	M-032405-00	441140
FLJ45966	M-032322-00	401120
FLJ46010	M-032323-00	401191
FLJ46257	M-032320-00	400932
FLJ90757	M-032395-00	440465
FLNA	M-012579-00	2316
FLT1	M-003136-02	2321
FLT3	M-003137-01	2322
FLT3LG	M-020176-00	2323
FLT4	M-003138-01	2324
FLVCR1	M-020584-00	28982
FN1	M-009853-01	2335
FN3K	M-006724-00	64122
FN3KRP	M-006817-00	79672
FNDC9	M-032302-00	408263
FOLR1	M-010403-00	2348
FOLR2	M-011173-00	11354
FOLR3	M-011190-00	2352
FPGT-TNNI3K,TNNI3K	M-005013-01	51086
FPR1	M-003667-00	2357
FPRL1	M-005140-00	2358
FPRL2	M-005141-00	2359
FRG2	M-032420-00	448831
FRK	M-003139-01	2444
FRS3	M-019038-00	10817
FRZB	M-020173-00	2487
FSHB	M-012537-00	2488
FSHR	M-005497-01	2492
FST	M-012221-00	10468
FUK	M-007255-00	197258
FXN	M-006691-00	2395
FXYD1	M-011977-00	5348
FY	M-005498-01	2532
FYB	M-020174-01	2533
FYN	M-003140-03	2534
FZD1	M-005499-01	8321
FZD10	M-005500-01	11211
FZD2	M-005501-01	2535
FZD3	M-005502-01	7976
FZD4	M-005503-01	8322
FZD5	M-005504-00	7855
FZD6	M-005505-00	8323
FZD7	M-003671-02	8324
FZD8	M-003962-01	8325
FZD9	M-005506-01	8326
GAB1	M-003553-00	2549
GABARAPL2	M-006853-01	11345
GABBR1	M-005509-00	2550
GABRA1	M-006162-02	2554
GABRA2	M-006163-01	2555
GABRA3	M-006164-00	2556
GABRA4	M-006165-00	2557
GABRA5	M-006166-00	2558
GABRA6	M-006167-01	2559
GABRB1	M-006168-00	19024
GABRB2	M-006169-00	2561
GABRB3	M-006170-01	2562
GABRD	M-006171-00	2563
GABRE	M-006172-00	2564
GABRG1	M-006173-01	2565
GABRG2	M-006174-01	2566
GABRG3	M-006175-00	2567
GABRP	M-006176-00	2568
GABRQ	M-006177-00	55879
GABRR1	M-006178-01	2569
GABRR2	M-006179-01	19390
GADD45A	M-003893-02	1647
GADD45G	M-003895-00	10912
GAK	M-005005-01	2580
GALK1	M-007728-01	2584
GALK2	M-006725-00	2585
GALR2	M-004140-01	8811
GAP43	M-011663-00	2596
GAST	M-011174-00	17563
GATC	M-032534-00	283459
GCG	M-017201-00	2641
GCGR	M-005511-01	2642
GCK	M-010819-01	2645
GDF1	M-013088-00	2657
GDF10	M-011976-00	2662
GDF11	M-012086-00	43373
GDF15	M-019875-00	9518
GDF2	M-013233-00	2658
GDF5	M-012271-00	39485
GDF9	M-012040-00	2661
GDNF	M-011040-00	2668
GFAP	M-011667-00	23042
GFRA1	M-007913-01	2674
GFRA2	M-007914-00	2675
GFRA3	M-007915-01	2676
GFRA4	M-007916-00	64096
GGNBP1	M-032463-00	449520
GH2	M-011668-00	2689
GHR	M-010402-00	23773
GHRH	M-019005-00	2691
GHRHR	M-005512-00	2692
GHRL	M-020860-00	51738
GHSR	M-005513-00	2693
GIP	M-019781-00	2695
GIPR	M-005514-00	2696
GIT1	M-020565-01	28964
GIT2	M-012860-00	9815
GJA1	M-011042-00	2697
GJA4	M-011669-00	2701
GJB1	M-017887-00	2705
GJB2	M-019285-00	2706
GJB3	M-019948-00	2707
GJB4	M-016916-00	127534
GJB5	M-017789-00	2709
GJB6	M-019916-00	10804
GJC1	M-019941-00	10052
GK	M-006727-00	2710
GK2	M-015091-01	2712
GLG1	M-010597-00	2734
GLP1R	M-005515-00	2740
GLP2R	M-005516-00	9340
GLRA1	M-006180-00	2741
GLRA2	M-006181-01	2742
GLRA3	M-006182-01	8001
GMFB	M-019100-00	2764
GMFG	M-019878-01	9535
GNA13	M-009948-00	10672
GNA14	M-008561-00	9630
GNA15	M-009327-00	2769
GNAI1	M-010404-01	2770
GNAI3	M-005184-00	2773
GNAO1	M-009486-01	2775
GNAQ	M-008562-00	2776
GNAS	M-010825-01	2778
GNAT1	M-009827-01	2779
GNAT2	M-010408-00	2780
GNAZ	M-010405-00	2781
GNB1	M-017242-00	2782
GNB3	M-011671-00	2784
GNB4	M-017238-00	59345
GNE	M-006729-00	10020
GNG11	M-016036-00	2791
GNG12	M-020575-00	55970
GNG3	M-012804-00	2785
GNG4	M-017066-00	2786
GNG5	M-012699-00	2787
GNG7	M-019807-00	2788
GNRH1	M-015410-00	2796
GNRH2	M-011288-00	2797
GNRHR	M-005517-01	2798
GNRHR2	M-005518-00	114814
GOSR1	M-011959-00	9527
GOSR2	M-010980-00	19602
GP1BA	M-011045-00	2811
GP1BB	M-013247-00	2812
GP6	M-021356-00	51206
GPBAR1	M-005519-00	151306
GPD1	M-008782-00	2819
GPR	M-005522-01	11245
GPR1	M-005523-00	2825
GPR10	M-005524-00	2834
GPR100	M-005525-01	339403
GPR101	M-005526-01	83.55
GPR105	M-005528-00	9934
GPR109A	M-006688-00	338442
GPR109B	M-005628-01	8843
GPR110	M-005531-01	266977
GPR111	M-005532-00	222611
GPR112	M-005533-00	139378
GPR113	M-005534-00	165082
GPR115	M-005536-01	221393
GPR116	M-005537-02	221395
GPR119	M-005521-00	139.76
GPR119	M-005521-00	139.76
GPR12	M-005538-00	2835
GPR123	M-005539-00	84435
GPR124	M-005540-00	25.96
GPR126	M-005541-01	57211
GPR128	M-005543-01	84873
GPR132	M-005507-01	29933
GPR135	M-005645-02	64582
GPR14	M-005544-01	2837
GPR141	M-005545-00	353345
GPR142	M-005546-01	350383
GPR143	M-005677-01	4935
GPR145	M-005548-01	84539
GPR146	M-005549-01	115.33
GPR147	M-005687-00	64106
GPR15	M-005550-00	2838
GPR155	M-005494-00	151556
GPR156	M-005508-00	165829
GPR157	M-016136-00	80045
GPR158L1	M-032393-00	440435
GPR160	M-005520-00	26996
GPR161	M-005720-00	23432
GPR17	M-005551-00	2840
GPR18	M-005552-00	2841
GPR19	M-005553-01	2842
GPR2	M-005554-00	2826
GPR20	M-005555-01	2843
GPR21	M-005556-00	2844
GPR22	M-005557-01	2845
GPR23	M-005558-01	2846
GPR24	M-005559-01	2847
GPR25	M-005560-00	2848
GPR26	M-005561-00	2849
GPR27	M-005562-01	2850
GPR3	M-003951-01	2827
GPR30	M-005563-01	2852
GPR31	M-005564-00	2853
GPR32	M-005565-01	2854
GPR34	M-005566-00	2857
GPR35	M-005567-00	2859
GPR37	M-003604-01	2861
GPR37L1	M-005490-01	9283
GPR39	M-005569-00	2863
GPR4	M-005570-01	2828
GPR40	M-005571-01	2864
GPR41	M-005572-00	2865
GPR42	M-005573-00	2866
GPR43	M-005574-00	2867
GPR44	M-005575-01	11251
GPR45	M-005576-00	11250
GPR48	M-003673-02	55366
GPR49	M-005577-00	8549
GPR50	M-005578-00	9248
GPR51	M-005579-01	9568
GPR52	M-005580-00	9293
GPR54	M-004901-00	84634
GPR55	M-005581-01	9290
GPR56	M-004552-00	9289
GPR58	M-005583-00	9287
GPR6	M-005584-01	2830
GPR61	M-005585-01	83873
GPR62	M-005586-00	118442
GPR63	M-005587-00	81491
GPR64	M-003812-02	10149
GPR65	M-005589-00	8477
GPR68	M-005591-01	8111
GPR7	M-005592-00	2831
GPR73	M-005593-00	10887
GPR73L1	M-005594-01	128674
GPR74	M-005595-00	10886
GPR75	M-005596-00	10936
GPR77	M-005597-01	27202
GPR78	M-005598-01	27201
GPR8	M-005599-01	2832
GPR80	M-005600-02	27199
GPR81	M-005601-01	27198
GPR82	M-005602-01	27197
GPR83	M-005603-00	10888
GPR84	M-005604-00	53831
GPR85	M-005605-00	54329
GPR86	M-005606-01	53829
GPR87	M-005607-00	53836
GPR88	M-005608-00	54112
GPR91	M-004541-00	56.67
GPR92	M-004604-01	57121
GPR97	M-005609-01	222487
GPRC5B	M-005610-01	51704
GPRC5C	M-005611-01	55.89
GPRC5D	M-005612-01	55507
GPRC6A	M-005613-00	222545
GPSM2	M-004092-00	29899
GRAP	M-012285-00	26206
GRAP2	M-017406-00	9402
GRB10	M-015313-00	2887
GRB14	M-019810-00	2888
GRB2	M-019220-00	2885
GRB7	M-012701-00	2886
GRCA	M-005614-00	27239
GRIA1	M-006184-00	31078
GRIA2	M-006185-00	2891
GRIA3	M-006186-01	2892
GRIA4	M-006187-01	2893
GRID2	M-006188-00	2895
GRIK2	M-006190-00	2898
GRIK3	M-006191-01	2899
GRIK4	M-006192-00	39692
GRIK5	M-006193-00	2901
GRIN1	M-006194-01	2902
GRIN2A	M-006195-00	2903
GRIN2B	M-006196-00	2904
GRIN2D	M-006198-00	2906
GRIN3A	M-006199-00	116443
GRINL1A	M-007919-01	81488
GRK1	M-004662-00	6011
GRK1	M-004662-01	6011
GRK4	M-004625-00	2868
GRK4	M-004625-00	2868
GRK5	M-004626-00	2869
GRK5	M-004626-00	2869
GRK6	M-004627-01	2870
GRK6	M-004627-01	2870
GRK7	M-004628-00	131890
GRK7	M-004628-00	131.89
GRM1	M-005616-01	2911
GRM2	M-005617-00	2912
GRM3	M-005618-01	2913
GRM4	M-005619-01	2914
GRM5	M-005620-02	2915
GRM6	M-005621-01	2916
GRM7	M-005622-00	2917
GRM8	M-005623-01	2918
GRP	M-017724-00	2922
GRPR	M-005624-00	2925
GSG2	M-005327-00	83903
GSK3A	M-003009-01	2931
GSK3B	M-003010-03	2932
GTF2B	M-012964-00	2959
GTF2E1	M-006531-00	33634
GTF2E2	M-017725-00	2961
GTF2H1	M-010924-00	2965
GUCY2C	M-005328-00	2984
GUCY2D	M-005329-01	3000
GUCY2F	M-004515-01	2986
GUK1	M-006734-01	2987
H963	M-005625-01	29909
HAMP	M-014014-01	57817
HAVCR2	M-016696-00	84868
HBB	M-011047-00	3043
HBEGF	M-019624-00	1839
HBG1	M-011115-00	3047
HBM	M-032371-00	445449
HCK	M-003141-02	3055
HDGF	M-019782-00	3068
HFE	M-011051-00	3077
HHCM	M-032328-00	10639
HIF1A	M-004018-02	3091
HIF3A	M-010068-02	64344
HIPK1	M-004809-02	204851
HIPK2	M-003266-03	28996
HIPK3	M-004810-00	10114
HIPK4	M-004808-02	147746
HK1	M-006820-01	3098
HK2	M-006735-01	3099
HK3	M-006736-00	3101
HLA-A	M-012850-00	3105
HLA-B	M-013203-00	3106
HLA-C	M-017513-00	3107
HLA-DMA	M-012105-00	3108
HLA-DMB	M-013238-00	3109
HLA-DOA	M-019456-00	3111
HLA-DOB	M-011686-00	3112
HLA-DPA1,HLA-DPB1	M-013229-00	3115
HLA-DQA1	M-013228-00	3117
HLA-DQB1	M-011687-00	3119
HLA-DRA	M-013296-01	3122
HLA-DRB1	M-011688-00	3123
HLA-DRB3	M-013204-00	3125
HLA-E	M-012106-00	3133
HLA-G	M-017490-00	3135
HMGA1	M-004597-00	3159
HMGN3	M-011932-00	9324
HNF4G	M-003407-01	3174
HRH1	M-004340-03	3269
HRH2	M-005630-01	3274
HRH3	M-005631-00	11255
HRH4	M-005632-00	59.34
HSPB8	M-005006-00	26353
HSPG2	M-014183-00	3339
HTR1A	M-005633-00	3350
HTR1B	M-005634-00	3351
HTR1D	M-005635-01	3352
HTR1E	M-005636-01	3354
HTR1F	M-005637-01	3355
HTR2A	M-005638-01	3356
HTR2C	M-005640-00	3358
HTR3A	M-006204-00	3359
HTR3B	M-006205-00	9177
HTR3C	M-006206-01	170572
HTR4	M-005641-00	3360
HTR5A	M-005642-02	3361
HTR6	M-005643-00	3362
HTR7	M-005644-01	3363
HUNK	M-004214-01	30811
IAPP	M-007790-00	3375
ICAM1	M-003502-01	3383
ICAM2	M-011182-00	3384
ICAM3	M-011698-00	3385
ICF45	M-016964-00	54974
ICK	M-004811-01	22858
IFNA10	M-019651-00	3446
IFNA13	M-014265-00	3447
IFNA14	M-019652-00	3448
IFNA16	M-019653-00	3449
IFNA17	M-014147-00	3451
IFNA2	M-013809-00	3440
IFNA21	M-019654-00	3452
IFNA4	M-014154-00	3441
IFNA5	M-012637-00	3442
IFNA6	M-014155-00	3443
IFNA8	M-019655-00	3445
IFNAR1	M-020209-00	3454
IFNAR2	M-015411-00	3455
IFNB1	M-019656-00	3456
IFNG	M-019379-00	3458
IFNGR1	M-011057-00	3459
IFNW1	M-012638-00	3467
IGF1	M-003011-03	3479
IGF1R	M-003012-04	3480
IGF2	M-004093-00	3481
IGFL4	M-032360-00	444882
IK	M-012190-00	3550
IKBKAP	M-009371-00	8518
IKBKB	M-003503-00	3551
IKBKE	M-003723-02	9641
IKBKG	M-003767-00	8517
IL10	M-005066-01	3586
IL10RA	M-007925-00	3587
IL10RB	M-007926-01	3588
IL11	M-007927-01	3589
IL11RA	M-007928-00	3590
IL12B	M-007930-00	3593
IL12RB1	M-007931-00	3594
IL12RB2	M-007932-00	3595
IL13RA1	M-007933-01	3597
IL13RA2	M-004598-00	3598
IL15	M-007934-01	39601
IL15RA	M-007935-00	3601
IL16	M-007936-01	3603
IL17A	M-007937-00	3605
IL17B	M-007938-01	2719
IL17C	M-007939-00	27189
IL17RA	M-007943-01	23765
IL17RB	M-007944-00	5554
IL18	M-007948-00	3606
IL18BP	M-017446-00	10068
IL18R1	M-007949-00	8809
IL18RAP	M-007950-00	8807
IL19	M-007951-01	29949
IL1A	M-007952-01	3552
IL1B	M-007953-01	3553
IL1F9	M-007959-00	563
IL1R1	M-005188-00	3554
IL1R2	M-007960-01	29767
IL1RAP	M-003504-00	3556
IL1RAPL1	M-007961-00	11141
IL1RAPL2	M-007962-00	2628
IL1RL1	M-007963-00	9173
IL1RL2	M-007965-00	8808
IL1RN	M-007966-01	3557
IL2	M-007967-00	3558
IL20RA	M-007969-01	53832
IL21R	M-007971-00	50615
IL22	M-007972-00	50616
IL22RA1	M-007973-00	58985
IL22RA2	M-007974-00	116379
IL23R	M-007976-00	149233
IL24	M-007977-01	11009
IL26	M-007978-01	55801
IL27RA	M-008108-00	9466
IL28RA	M-007981-00	163702
IL2RA	M-007983-00	3559
IL2RB	M-007984-00	3560
IL2RG	M-007985-00	3561
IL3	M-007986-01	3562
IL31RA	M-007862-00	133396
IL36A	M-007956-01	27179
IL36B	M-007958-01	27177
IL36RN	M-007955-01	26525
IL37	M-007957-01	27178
IL3RA	M-007988-01	3563
IL4	M-007989-00	3565
IL4R	M-007990-00	3566
IL5	M-007991-00	3567
IL5RA	M-007992-00	3568
IL6	M-007993-01	3569
IL6R	M-007994-00	3570
IL6ST	M-005166-00	3572
IL7	M-007995-01	3574
IL7R	M-007996-01	3575
IL8	M-004756-00	3576
IL8RA	M-005646-01	3577
IL8RB	M-005647-00	3579
IL9	M-007997-01	3578
IL9R	M-007998-01	3581
ILK	M-004499-00	3611
ILKAP	M-010260-00	80895
INHA	M-011700-00	3623
INHBA	M-011701-01	3624
INHBB	M-011702-01	3625
INHBC	M-012113-01	3626
INPPL1	M-004152-01	3636
INS	M-011058-00	3630
INSL3	M-020006-00	3640
INSL4	M-011703-00	3641
INSL5	M-019960-00	10022
INSL6	M-019675-00	11172
INSR	M-003014-01	3643
INSRR	M-005332-00	3645
IP6K1	M-006737-01	9807
IP6K2	M-006738-00	51447
IP6K3	M-006739-00	117283
IPMK	M-006740-01	253430
IPPK	M-006703-02	64768
IQCH	M-007726-00	64799
IRAK1	M-004760-02	3654
IRAK2	M-004761-00	3656
IRAK3	M-004762-00	11213
IRS1	M-003015-01	3667
IRS2	M-003554-00	22858
IRS4	M-011480-00	8471
ITGA10	M-007999-00	8515
ITGA2	M-004566-01	3673
ITGA2B	M-008001-00	3674
ITGA3	M-004571-00	3675
ITGA4	M-005189-01	3676
ITGA5	M-008003-01	3678
ITGA6	M-007214-00	3655
ITGA7	M-008004-00	3679
ITGA8	M-010699-00	8516
ITGA9	M-008005-00	3680
ITGAE	M-008006-00	3682
ITGAL	M-008007-01	3683
ITGAM	M-008008-00	3684
ITGAX	M-008009-01	3687
ITGB1	M-004506-00	3688
ITGB1BP1	M-011927-00	9270
ITGB2	M-008010-00	3689
ITGB3	M-004124-02	3690
ITGB3BP	M-017722-00	23421
ITGB4	M-008011-01	3691
ITGB5	M-004125-00	3693
ITGB6	M-008012-01	3694
ITK	M-003144-02	3702
ITPK1	M-006741-00	3705
ITPKA	M-006742-01	3706
ITPKB	M-006743-02	3707
ITPKC	M-006744-01	80271
ITPR1	M-006207-00	3708
ITPR3	M-006209-01	3710
JAG2	M-017187-00	3714
JAK1	M-003145-01	3716
JAK2	M-003146-02	3717
JAK3	M-003147-01	3718
JMJD1C	M-012686-00	221037
KAB	M-021258-00	9859
KAL1	M-011061-00	3730
KALRN	M-005045-00	11139
KATNAL2	M-032522-00	83473
KCNA1	M-006210-01	3736
KCNA3	M-006213-00	3738
KCNAB2	M-009368-00	8514
KCNAB3	M-008846-01	9196
KCND1	M-006224-00	3750
KCND2	M-006225-00	3751
KCND3	M-006226-00	3752
KCNE1	M-009044-00	3753
KCNE3	M-017528-00	10008
KCNH2	M-006233-01	3757
KCNH3	M-010707-00	23416
KCNH4	M-006234-01	23415
KCNH6	M-006236-01	81033
KCNH7	M-006237-01	90134
KCNH8	M-006238-01	131096
KCNJ11	M-006241-00	3767
KCNJ2	M-006247-00	3759
KCNJ3	M-006248-00	3760
KCNJ5	M-006250-01	3762
KCNJ6	M-006251-00	3763
KCNJ8	M-006252-00	3764
KCNJ9	M-006253-00	3765
KCNK13	M-006257-01	56659
KCNK3	M-006262-00	3777
KCNK9	M-004891-01	51305
KCNQ1	M-006271-01	3784
KCNQ2	M-006272-01	3785
KCNQ3	M-006273-00	3786
KCNQ4	M-006274-00	9132
KCNS2	M-010698-00	3788
KCNT1	M-010714-00	57582
KCNV2	M-006279-01	169522
KCTD2	M-032516-00	23510
KDELR2	M-012315-00	11014
KDELR3	M-012316-00	11015
KDR	M-003148-01	3791
KHK,CGREF1	M-006745-02	3795
KIAA1399	M-023172-01	57574
KIAA1804	M-004063-00	84451
KIF11	M-003317-01	3832
KIF12	M-008252-01	11322
KIF13A	M-008257-01	63971
KIF13B	M-004963-00	23303
KIF14	M-003319-00	9928
KIF15	M-004960-00	56992
KIF16B	M-009495-01	55614
KIF17	M-022067-01	57576
KIF18A	M-006849-00	8193
KIF1A	M-010236-00	547
KIF1B	M-009317-00	23095
KIF1C	M-010354-01	10749
KIF20A	M-004957-01	10112
KIF20B	M-003318-01	9585
KIF21A	M-004969-00	55605
KIF22	M-004962-00	3835
KIF23	M-004956-01	9493
KIF25	M-010082-00	3834
KIF26A	M-022010-01	26153
KIF2A	M-004959-01	3796
KIF2B	M-008345-01	84643
KIF2C	M-004955-01	11004
KIF3A	M-004964-02	11127
KIF3B	M-009595-01	9371
KIF3C	M-009469-01	3797
KIF4A	M-004961-00	24137
KIF5A	M-008559-01	3798
KIF5B	M-008867-00	3799
KIF5C	M-019811-00	39662
KIF9	M-004967-00	64147
KIFC1	M-004958-01	3833
KIFC3	M-008338-01	3801
KIR2DL5	M-020310-00	57292
KIT	M-003150-01	3815
KITLG	M-011184-00	4254
KLRAP1	M-020139-00	10748
KLRC4-KLRK1,KLRC4	M-013593-00	8302
KLRD1	M-011304-00	3824
KLRF1	M-020680-00	51348
KPNA4	M-017477-00	3840
KPNA6	M-017295-00	23633
KRT10	M-023057-00	3858
KRT12	M-011062-00	3859
KRT13	M-011709-00	3860
KRT14	M-010602-01	3861
KRT15	M-011710-00	3866
KRT19	M-017624-00	3880
KRT2	M-011066-00	3849
KRT20	M-013390-00	54474
KRT3	M-012902-00	3850
KRT35	M-011312-00	3886
KRT36	M-011513-00	8689
KRT4	M-011711-00	3851
KRT5	M-011067-00	3852
KRT6A	M-012116-00	3853
KRT6B	M-012117-00	3854
KRT6C	M-013021-00	140446
KRT7	M-019277-00	3855
KRT73	M-018002-00	319101
KRT75	M-019835-00	9119
KRT76	M-020783-00	5135
KRT8	M-019658-00	3856
KRTAP5-1	M-032497-00	387264
KSR2	M-005322-01	283455
LAMA1	M-012118-00	284217
LAMA3	M-011071-00	3909
LAMB1	M-011713-00	3912
LAMB2	M-013310-00	3913
LAMB3	M-011072-00	3914
LAMC1	M-011714-00	3915
LAMC2	M-012119-00	3918
LAMC3	M-012173-00	10319
LAMR1	M-013303-00	3921
LAMTOR3	M-003572-02	8649
LANCL1	M-012166-00	10314
LAT	M-020541-00	39564
LATS1	M-004632-00	9113
LATS2	M-003865-00	26524
LBR	M-021505-00	3930
LCK	M-003151-01	3932
LCN10	M-032327-00	414332
LCP2	M-012120-00	3937
LDLR	M-011073-01	3949
LEP	M-011074-00	3952
LEPR	M-008015-01	3953
LGALS1	M-011718-00	3956
LGALS3BP	M-008016-00	3959
LGALS9	M-011319-00	3965
LGR7	M-005649-00	59350
LGR8	M-005615-00	122042
LHB	M-011183-00	3972
LHCGR	M-003681-00	3973
LIF	M-011720-00	3976
LIG4	M-004254-00	3981
LILRA4	M-012449-00	23547
LILRB1	M-017168-00	10859
LILRB2	M-020017-00	10288
LILRB4	M-017091-00	11006
LILRB5	M-017687-00	34972
LIMK1	M-007730-01	3984
LIMK2	M-003311-02	3985
LINC00238	M-032390-00	440184
LLGL1	M-011877-00	3996
LMBR1L	M-020750-00	55716
LMNA	M-004978-00	4000
LMNB2	M-005290-00	84823
LMTK2	M-003149-01	22853
LMTK3	M-005338-01	114783
LOC100130417	M-031714-00	0
LOC115131	M-008400-01	115131
LOC163223	M-032305-00	163223
LOC283174	M-032336-00	283174
LOC284757	M-032381-00	284757
LOC387646	M-032504-00	387646
LOC388962	M-032542-00	388962
LOC389831	M-031701-00	0
LOC389832	M-031704-00	0
LOC389834	M-031707-00	0
LOC389841	M-031602-00	0
LOC389842	M-031603-00	0
LOC389844	M-031664-00	0
LOC389846	M-031666-00	0
LOC389857	M-031547-00	0
LOC389873	M-031582-00	0
LOC389878	M-031562-00	0
LOC389888	M-031613-00	0
LOC389892	M-031618-00	0
LOC389893	M-031619-00	0
LOC389895	M-031620-00	0
LOC389896	M-031621-00	0
LOC389899	M-031631-00	0
LOC389900	M-031591-00	0
LOC389901	M-031592-00	0
LOC389904	M-031636-00	0
LOC389905	M-031652-00	0
LOC389907	M-031656-00	0
LOC389908	M-031657-00	0
LOC389910	M-031659-00	0
LOC389915	M-031681-00	0
LOC389916	M-031674-00	0
LOC392425	M-031606-00	0
LOC392433	M-031609-00	0
LOC392439	M-031610-00	0
LOC392447	M-031669-00	0
LOC392467	M-031552-00	0
LOC392473	M-031542-00	0
LOC392486	M-031585-00	0
LOC392487	M-031586-00	0
LOC392512	M-031568-00	0
LOC392517	M-031570-00	0
LOC392528	M-031648-00	0
LOC392531	M-031649-00	0
LOC392533	M-031650-00	0
LOC392539	M-031626-00	0
LOC392546	M-031628-00	0
LOC392549	M-031629-00	0
LOC392559	M-031639-00	0
LOC392563	M-031654-00	0
LOC392582	M-031677-00	0
LOC392583	M-031678-00	0
LOC392584	M-031679-00	0
LOC392586	M-031680-00	0
LOC401577	M-031632-00	0
LOC401579	M-031597-00	0
LOC401581	M-031600-00	0
LOC401584	M-031667-00	0
LOC401589	M-031548-00	0
LOC401590	M-031549-00	0
LOC401599	M-031584-00	0
LOC401605	M-031558-00	0
LOC401606	M-031559-00	0
LOC401607	M-031560-00	0
LOC401611	M-031565-00	0
LOC401613	M-031635-00	0
LOC401616	M-031644-00	0
LOC401618	M-031611-00	0
LOC401620	M-031594-00	0
LOC401621	M-031637-00	0
LOC401622	M-031638-00	0
LOC401623	M-031633-00	0
LOC401624	M-031634-00	0
LOC401625	M-031655-00	0
LOC401628	M-031696-00	0
LOC402388	M-031642-00	0
LOC402414	M-031670-00	0
LOC402434	M-031693-00	0
LOC402436	M-031695-00	0
LOC402556	M-031795-00	0
LOC402558	M-031799-00	0
LOC414059	M-032309-00	414059
LOC440607	M-032397-00	440607
LOC474170	M-032505-00	474170
LOR	M-011077-00	4014
LPHN1	M-005650-01	22859
LPHN2	M-005651-01	23266
LPHN3	M-005652-01	23284
LPPR3	M-014501-00	79948
LRP1	M-004721-00	4035
LRP12	M-010233-00	29967
LRP1B	M-010665-00	53353
LRP2	M-012673-00	4036
LRP3	M-019609-00	4037
LRP5	M-003844-00	4041
LRP6	M-003845-01	39541
LRP8	M-011802-00	7804
LRPAP1	M-003610-01	4043
LRRC52	M-032418-00	440699
LRRIQ1	M-032523-00	84125
LRRK1	M-005320-01	79705
LSP1	M-012640-00	4046
LTA	M-010520-01	4049
LTB	M-010521-01	39571
LTB4R	M-005653-00	1241
LTB4R2	M-005654-01	56413
LTBP4	M-019552-00	8425
LTBR	M-008023-01	4055
LTK	M-003152-01	4058
LUM	M-016684-00	39602
LY6G6F	M-032364-00	259215
LYN	M-003153-03	2534
LYSMD1	M-032541-00	388695
M6PR	M-010611-01	4074
MAGI3	M-009453-01	260425
MAK	M-004813-01	4117
MALT1	M-005936-01	10892
MAML2	M-013568-00	84441
MAP1A	M-013482-00	39903
MAP1B	M-010348-01	4131
MAP1LC3C	M-032399-00	440738
MAP2	M-007299-00	4133
MAP2K1	M-003571-01	5604
MAP2K2	M-003573-03	5605
MAP2K3	M-003509-01	5606
MAP2K4	M-003574-02	6416
MAP2K5	M-003966-03	5607
MAP2K6	M-003967-00	5608
MAP2K7	M-004016-01	5609
MAP3K1	M-003575-01	4214
MAP3K10	M-003576-01	4294
MAP3K11	M-003577-02	4296
MAP3K12	M-003312-02	7786
MAP3K13	M-003579-01	9175
MAP3K14	M-003580-03	9020
MAP3K2	M-003582-01	10746
MAP3K3	M-003301-02	4215
MAP3K4	M-003789-02	4216
MAP3K5	M-003584-02	4217
MAP3K6	M-003969-00	9064
MAP3K7	M-003790-05	6885
MAP3K8	M-003511-03	1326
MAP3K9	M-003585-01	4293
MAP4K1	M-003586-01	11184
MAP4K2	M-003587-01	5871
MAP4K3	M-003588-01	8491
MAP4K4	M-003971-02	9448
MAP4K5	M-003589-02	11183
MAP7	M-011563-00	9053
MAPK1	M-003555-02	5594
MAPK10	M-004324-00	5602
MAPK11	M-003972-03	5600
MAPK12	M-003590-00	6300
MAPK13	M-003591-02	5603
MAPK14	M-003512-05	1432
MAPK15	M-004807-01	225689
MAPK3	M-003592-02	5595
MAPK4	M-003593-02	5596
MAPK6	M-003594-01	5597
MAPK7	M-003513-02	5598
MAPK8	M-003514-01	5599
MAPK8IP1	M-003595-00	9479
MAPK8IP2	M-012462-00	23542
MAPK8IP3	M-003596-01	23162
MAPK9	M-003505-02	5601
MAPKAPK2	M-003516-02	9261
MAPKAPK3	M-005014-01	7867
MAPKAPK5	M-005015-00	8550
MAPT	M-012488-00	4137
MARCO	M-008025-00	8685
MARK1	M-004259-02	4139
MARK2	M-004260-01	2011
MARK3	M-003517-03	4140
MARK4	M-005345-02	57787
MAS1	M-003684-01	4142
MAS1L	M-005655-01	116511
MASS1	M-005656-01	84059
MAST1	M-004672-02	22983
MAST2	M-004633-00	23139
MAST3	M-004046-00	23031
MASTL	M-004020-03	84930
MATK	M-003154-03	4145
MATN1	M-011328-00	4146
MATN3	M-003685-00	4148
MATR3	M-017382-00	9782
MBC2	M-010652-00	23344
MBIP	M-021396-00	51562
MBP	M-019663-00	4155
MC1R	M-005657-01	4157
MC2R	M-005658-01	4158
MC3R	M-005659-01	4159
MC4R	M-005660-00	4160
MC5R	M-005661-00	4161
MCART6	M-031566-00	401612
MCC	M-010523-01	4163
MCOLN1	M-006281-00	57192
MCOLN3	M-015371-00	55283
MDK	M-003677-00	4192
MECOM	M-006530-01	2122
MED1	M-004126-03	5469
MED14	M-011928-00	9282
MED17	M-006312-01	14854
MED26	M-011948-01	9441
MED7	M-017313-00	9443
MELK	M-004029-01	9833
MERTK	M-003155-01	10461
MET	M-003156-02	4233
METTL10	M-032543-00	399818
MGC12815	M-032312-00	414062
MGC24137	M-003978-00	143503
MGC26484	M-008030-00	168448
MGC26856	M-016259-00	256.71
MGC35440	M-032529-00	147990
MGC39584	M-032403-00	441058
MGC40047	M-008997-00	284521
MGC44903	M-032310-00	414060
MGC57359	M-032406-00	441272
MGP	M-009770-00	4256
MIA	M-020116-00	42216
MINK1	M-004861-02	50488
MINPP1	M-009705-00	9562
MIP	M-012179-00	4284
MKNK1	M-004879-01	8569
MKNK2	M-004908-01	2872
MLC1	M-012880-00	23209
MLKL	M-005326-00	197259
MLN	M-012641-00	4295
MLNR	M-005568-00	2862
MOK	M-004838-01	5891
MOS	M-003859-02	4342
MPL	M-003908-02	4352
MPP1	M-010252-00	4354
MPP2	M-009729-00	4355
MPP3	M-010612-01	4356
MPRA	M-008033-01	164091
MPZ	M-015424-00	4359
MPZL1	M-015738-01	9019
MRC1	M-011730-00	11779
MRC2	M-020064-00	9902
MRGPRF	M-005662-00	219928
MRGX1	M-005665-00	259249
MRGX2	M-005666-01	117194
MRGX3	M-005667-01	117195
MRGX4	M-005668-02	117196
MRPL1	M-017264-00	65008
MRPL13	M-013557-00	28998
MRPL28	M-017627-00	10573
MRPL32	M-013512-00	64983
MRPS11	M-013623-00	64963
MS4A1	M-012214-00	931
MS4A2	M-011035-01	2206
MS4A6A	M-012893-00	64231
MS4A7	M-003644-02	58475
MS4A8B	M-008767-00	83661
MSR1	M-008035-00	4481
MST1R	M-003157-02	4486
MST4	M-003753-01	51765
MSTN	M-012039-00	22677
MTA1	M-004127-01	9112
MTHFD2L	M-032402-00	441024
MTM1	M-008036-01	4534
MTMR1	M-008037-01	8776
MTMR2	M-008038-00	8898
MTMR3	M-008039-01	8897
MTMR4	M-008040-01	39760
MTMR6	M-008309-00	9107
MTMR7	M-008041-00	9108
MTMR8	M-008042-01	55613
MTNR1A	M-005669-01	4543
MTNR1B	M-005670-00	4544
MTOR	M-003008-01	2475
MUSK	M-003158-01	4593
MVD	M-006748-00	4597
MVK	M-006749-00	4598
MYBPC3	M-011085-00	4607
MYD88	M-004769-00	4615
MYL4	M-011738-00	4635
MYLK	M-005351-04	4638
MYLK2	M-005352-02	85366
MYLK3	M-005342-02	91807
MYO3A	M-004862-00	53904
MYO3B	M-004863-00	140469
MYOC	M-011089-00	4653
MYOT	M-019841-00	9499
NADK	M-006318-00	65220
NAGK	M-006750-00	55577
NAPB	M-031875-00	63908
NBEA	M-015419-00	26960
NCCRP1	M-032307-00	342897
NCF2	M-004529-01	4688
NCK1	M-006354-01	23832
NCK2	M-019547-00	14823
NCOA1	M-005196-01	8648
NCOA2	M-020159-00	10499
NCOA6	M-019107-01	23054
NCR1	M-020866-00	9437
NCR3	M-016894-01	259197
NDP	M-011091-00	4693
NDUFB4	M-032508-00	4710
NEB	M-011882-00	4703
NEFH	M-019165-00	4744
NEK1	M-004864-00	4750
NEK11	M-004865-01	79858
NEK2	M-004090-03	4751
NEK3	M-004867-01	4752
NEK4	M-003519-01	6787
NEK6	M-004166-01	10783
NEK7	M-003795-02	140609
NEK8	M-004866-00	284086
NEK9	M-004869-01	91754
NF2	M-003917-00	4771
NFKBIB	M-015757-00	4793
NGF	M-019673-00	4803
NGFR	M-009340-01	4804
NHP2L1	M-019900-00	4809
NID	M-019674-00	4811
NIM1	M-005016-01	167359
NLK	M-004763-01	51701
NMB	M-003950-00	4828
NMBR	M-003687-00	4829
NME1-NME2,NME1	M-006821-01	4830
NME1-NME2,NME2	M-005102-01	4831
NME3	M-006753-00	4832
NME4	M-006494-00	4833
NME5	M-006754-00	8382
NME6	M-006755-01	10201
NME7	M-006756-02	29922
NME8	M-006791-00	51314
NMU	M-020079-00	10874
NMUR1	M-005590-00	10316
NMUR2	M-005671-00	56923
NOMO3	M-032376-00	408050
NOTCH1	M-007771-00	4851
NOTCH2	M-012235-00	4853
NOTCH3	M-011093-00	4854
NOTCH4	M-011883-00	4855
NOV	M-010527-01	4856
NPAS1	M-010317-01	4861
NPAS4	M-017889-00	266743
NPC1	M-008047-00	4864
NPHP1	M-011094-00	4867
NPHP4	M-012888-00	261734
NPPA	M-012729-00	4878
NPPB	M-019676-00	4879
NPR1	M-005354-00	4881
NPR1	M-005354-00	4881
NPR2	M-005355-01	4882
NPR2	M-005355-01	4882
NPR3	M-008049-01	4883
NPTN	M-012477-00	39504
NPTXR	M-012507-00	23467
NPY	M-017695-00	4852
NPY1R	M-005672-00	4886
NPY2R	M-005673-01	4887
NPY5R	M-005674-00	4889
NR0B1	M-003409-00	190
NR0B2	M-003410-00	8431
NR1D1	M-003411-01	9572
NR1D2	M-003432-00	9975
NR1H2	M-003412-01	7376
NR1H3	M-003413-01	10062
NR1H4	M-003414-00	9971
NR1I2	M-003415-01	8856
NR1I3	M-003416-01	34212
NR2C1	M-003417-01	7181
NR2C2	M-003418-01	7182
NR2E1	M-003419-00	7101
NR2E3	M-003420-00	10002
NR2F1	M-003421-01	7025
NR2F2	M-003422-00	7026
NR2F6	M-003423-00	2063
NR3C1	M-003424-02	2908
NR3C2	M-003425-01	4306
NR4A1	M-003426-03	3164
NR4A2	M-003427-01	4929
NR5A1	M-003429-00	2516
NR5A2	M-003430-01	2494
NR6A1	M-003431-01	2649
NRARP	M-032409-00	441478
NRBF2	M-014648-00	29982
NRBP1	M-005356-01	29959
NRBP2	M-005340-01	340371
NRG3	M-026286-00	10718
NRP2	M-017721-00	8828
NRTN	M-011884-00	4902
NSMAF	M-017920-00	8439
NTF3	M-013405-00	4908
NTF4	M-012236-00	4909
NTN1	M-011946-00	9423
NTN3	M-020117-00	4917
NTN4	M-031987-00	59277
NTRK1	M-003159-01	4914
NTRK2	M-003160-01	4915
NTRK3	M-003161-01	4916
NTS	M-010170-00	4922
NTSR1	M-005675-00	4923
NTSR2	M-005676-00	23.62
NUAK1	M-004931-00	9891
NUAK2	M-005374-01	81788
NUMA1	M-005272-00	4926
NUP98	M-013078-00	4928
NXT1	M-017194-00	29107
OBSCN	M-005336-00	57729
OGFR	M-019185-00	11054
OLR1	M-003804-02	4973
OPCML	M-011743-00	4978
OPN1LW	M-005678-00	5956
OPN1MW	M-005679-00	2652
OPN1SW	M-005680-00	611
OPN3	M-005681-01	23596
OPN4	M-005682-00	94233
OPN5	M-025110-00	221391
OPRD1	M-005683-00	4985
OPRK1	M-005684-01	4986
OPRL1	M-005685-00	4987
OPRM1	M-005686-01	4988
OR10A5	M-008750-00	144124
OR10A7	M-032440-00	121364
OR10AG1	M-032473-00	282770
OR10C1	M-032515-00	442194
OR10G2	M-032458-00	26534
OR10G3	M-032457-00	26533
OR10H1	M-020479-00	26539
OR10H2	M-008904-00	26538
OR10J1	M-008901-00	26476
OR10J3	M-032411-00	441911
OR10K1	M-032412-00	391109
OR10K2	M-032413-00	391107
OR10P1	M-032538-00	121130
OR10V1	M-032448-00	390201
OR11A1	M-008813-00	26531
OR11G2	M-032483-00	390439
OR11H1	M-032429-00	81061
OR12D2	M-008814-00	26529
OR12D3	M-009796-00	81797
OR13G1	M-032470-00	441933
OR14A16	M-032346-00	284532
OR14J1	M-032521-00	442191
OR1A1	M-008911-00	8383
OR1A2	M-008912-00	26189
OR1C1	M-021656-00	26188
OR1D2	M-009079-00	4991
OR1D4	M-009066-00	8385
OR1D5	M-020461-00	8386
OR1E1	M-009038-00	8387
OR1E2	M-012609-00	8388
OR1F1	M-008798-00	4992
OR1G1	M-009068-00	8390
OR1J5	M-026243-00	26740
OR1L1	M-032426-00	26737
OR1L3	M-032424-00	26735
OR1L4	M-032425-00	254973
OR2A1	M-032445-00	346528
OR2A2	M-032465-00	442361
OR2A4	M-009046-00	79541
OR2AE1	M-032436-00	81392
OR2AT4	M-032443-00	341152
OR2B2	M-008800-00	81697
OR2B3	M-032423-00	442184
OR2C1	M-008801-00	4993
OR2C3	M-021427-00	81472
OR2F1	M-020188-00	26211
OR2G2	M-032339-00	81470
OR2H1	M-018165-00	26716
OR2H3	M-008264-01	7932
OR2J2	M-014667-00	26707
OR2J3	M-032419-00	442186
OR2L8	M-032344-00	391190
OR2S2	M-020799-00	56656
OR2T1	M-021670-00	26696
OR2T11	M-032345-00	127077
OR2T2	M-032378-00	401992
OR2T3	M-032477-00	343173
OR2T6	M-032462-00	254879
OR2W1	M-014666-00	26692
OR2W5	M-032414-00	441932
OR2Y1	M-032314-00	134083
OR3A1	M-009039-00	4994
OR3A2	M-009040-00	4995
OR3A3	M-008612-00	8392
OR3A4P	M-032453-00	390756
OR4A15	M-032435-00	81328
OR4A16	M-032434-00	81327
OR4A47	M-032485-00	403253
OR4A5	M-032433-00	81318
OR4B1	M-032461-00	119765
OR4C15	M-032341-00	81309
OR4C45	M-032486-00	403257
OR4D1	M-023248-00	26689
OR4E2	M-032338-00	26686
OR4F15	M-032316-00	390649
OR4F16	M-032437-00	81399
OR4F17	M-032430-00	81099
OR4F21	M-032484-00	441308
OR4F3	M-032422-00	26683
OR4F4	M-032379-00	26682
OR4F5	M-032468-00	79501
OR4F6	M-032450-00	390648
OR4K1	M-032374-00	79544
OR4K13	M-032415-00	390433
OR4K15	M-032469-00	81127
OR4K2	M-032482-00	390431
OR4K5	M-032467-00	79317
OR4M1	M-032481-00	441670
OR4P4	M-032377-00	81300
OR4Q3	M-032531-00	441669
OR51A4	M-032452-00	401666
OR51B2	M-009098-00	79345
OR51B4	M-009072-00	79339
OR51B5	M-032495-00	282763
OR51E2	M-008774-00	81285
OR51G1	M-032427-00	79324
OR51G2	M-032428-00	81282
OR52A1	M-009058-00	23538
OR52A4	M-032421-00	390053
OR52H1	M-032446-00	390067
OR56A1	M-032340-00	120796
OR5AC2	M-032526-00	81050
OR5AK2	M-032447-00	390181
OR5AP2	M-032361-00	338675
OR5B17	M-032471-00	219965
OR5B2	M-032494-00	390190
OR5B3	M-032460-00	441608
OR5D16	M-032478-00	390144
OR5F1	M-026622-00	338674
OR5H1	M-032454-00	26341
OR5H14	M-032487-00	403273
OR5H15	M-032488-00	403274
OR5H2	M-032466-00	79310
OR5H6	M-032464-00	79295
OR5I1	M-008791-00	10798
OR5J2	M-032474-00	282775
OR5K2	M-032416-00	402135
OR5K3	M-032489-00	403277
[truncated: 888 more rows]
